# Supplementary material
Source: MDPI journal article supplement (https://www.mdpi.com/2075-163X/8/2/69)
Supplement: s1 [file s1]

data_9999
_pd_proc_number_of_points   6327
_space_group_crystal_system	hexagonal
_diffrn_radiation_probe  x-ray
_diffrn_radiation_type   'CuK\a'
_diffrn_measurement_device_type   'AXS-Bruker D8 Advance'
_pd_instr_geometry Debye-Scherrer

_pd_spec_mounting   capillary
_pd_meas_scan_method   step
_pd_spec_mount_mode   transmission
_pd_char_colour   white
_cell_measurement_temperature   298(1)
_diffrn_ambient_temperature  298(1)
_pd_char_particle_morphology   'fibers'
_chemical_name_systematic
;
Potassium Calcium Magnesium Tecto-alumosilicate Hydrate *
;

_chemical_formula_sum
'Al5.85 Ca1.64 K1.00 Mg0.90 O53.58 Si12.15'

_chemical_formula_analytical
'K1.2(1) Mg1.0(1) Ca1.1(1) Al4.9(1) Si13.1(1) O36(2) (H2O)15.7'

_chemical_name_mineral 'Offretite'
_chemical_compound_source 'Fittà, Italy'
_cell_length_a  13.30943(21)
_cell_length_b  13.30943(21)
_cell_length_c  7.58783(12)
_cell_angle_alpha 90
_cell_angle_beta  90
_cell_angle_gamma 120
_cell_volume 1164.039(42)
_symmetry_space_group_name_H-M P-6m2
loop_
_symmetry_equiv_pos_as_xyz
	'-x+y, -x, -z'
	'-x+y, -x, z'
	'-x+y, y, -z'
	'-x+y, y, z'
	'-y, -x, -z'
	'-y, -x, z'
	'-y, x-y, -z'
	'-y, x-y, z'
	'x, y, -z'
	'x, y, z'
	'x, x-y, -z'
	'x, x-y, z'
loop_
_atom_site_label
_atom_site_type_symbol
_atom_site_symmetry_multiplicity
_atom_site_fract_x
_atom_site_fract_y
_atom_site_fract_z
_atom_site_occupancy
_atom_site_B_iso_or_equiv
Si1 Si  12 0.00183(76) 0.23513(54) 0.21870(42) 0.664 0.899(54)
Al1 Al  12 0.00183(76) 0.23513(54) 0.21870(42) 0.336 0.899(54)
Si2 Si   6 0.09336(62) 0.42685(67) 0.5 0.697 0.899(54)
Al2 Al   6 0.09336(62) 0.42685(67) 0.5 0.303 0.899(54)
O1 O  12 0.02958(85) 0.35347(82) 0.3160(10) 1 1.92(12)
O2 O   6 0.09632(64) 0.90368(64) 0.2530(20) 1 1.92(12)
O3 O   6 0.87203(62) 0.12797(62) 0.2589(16) 1 1.92(12)
O4 O   6 0.0036(17) 0.2766(12) 0 1 1.92(12)
O5 O   3 0.2343(11) 0.7657(11) 0.5 1 1.92(12)
O6 O   3 0.45646(79) 0.54354(79) 0.5 1 1.92(12)
K1 K   1 0 0 0.5 1 1.52(23)
Mg1 Mg   1 0.3333333 0.6666667 0 0.896(25) 1.52(23)
Ca1 Ca   2 0.6666667 0.3333333 0.3792(36) 0.429(13) 2.83(40)
Ca2 Ca   2 0.6666667 0.3333333 0.2208(34) 0.391(13) 2.83(40)
O7 O   2 0.3333333 0.6666667 0.2911(29) 1 4.43(36)
O8 O   3 0.2526(19) 0.7474(19) 0 0.614(32) 4.43(36)
O9 O   6 0.1228(18) 0.4891(14) 0 0.720(15) 4.43(36)
O10 O   3 0.7743(14) 0.2257(14) 0.5 1 4.43(36)
O11 O   6 0.57488(66) 0.42512(66) 0.1971(18) 1 4.43(36)
O12 O   3 -0.2462(87) 0.2462(87) 0 0.140(30) 4.43(36)


_pd_proc_ls_profile_function      'FPA (Cheary & Coelho, 1992)'        
_pd_proc_ls_background_function   'Chebychev polynomial'
_pd_proc_ls_pref_orient_corr               
;
Preferred Orientation Spherical Harmonics 
      Order                                   8
      y00                                     1
      y20                                     0.141
      y40                                     0.181
      y60                                    -0.024
      y66p                                    0.036
      y80                                     0.185
      y86p                                    0.059
;

_pd_proc_ls_prof_R_factor         1.66        
_pd_proc_ls_prof_wR_factor        2.23        
_pd_proc_ls_prof_wR_expected      1.00        
_refine_ls_R_I_factor             0.92

_refine_special_details
;
Fundamental Parameters Approach with full axial approximation. 
;

_refine_ls_matrix_type            full      
_refine_ls_weighting_scheme   calc
_refine_ls_weighting_details      '1/[Y~i~]'
_refine_ls_hydrogen_treatment   noref        
_refine_ls_extinction_method      none          
_refine_ls_number_parameters      107        
_refine_ls_number_restraints      0        
_refine_ls_number_constraints     0        

_refine_ls_goodness_of_fit_all    2.23        
_refine_ls_shift/su_max           0.01        

_pd_proc_2theta_range_min         6.00        
_pd_proc_2theta_range_max         145.01        
_pd_proc_2theta_range_inc         0.022        

loop_  
_pd_proc_wavelength               
1.540596
1.541058
1.544410
1.544721
1.534753

#CuK\a~1a~   1.540596
#CuK\a~1b~   1.541058
#CuK\a~2a~   1.544410
#CuK\a~2b~   1.544721
#satellites  1.534753     

_computing_data_collection        'XRD Commander (Bruker AXS, 2004)'        
_computing_structure_refinement   'Topas 4.2 (Bruker AXS, 2009)'      
